# Supplementary material for: BGC-val: a model- and grid-independent Python toolkit to evaluate marine biogeochemical models
Source: Copernicus journal article supplement (doi:10.5194/gmd-11-4215-2018), 2018-10-17
Supplement: Supplementary file 1 [file gmd-11-4215-2018-supplement.zip]

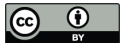

## Supplement of

# BGC-val: a model- and grid-independent Python toolkit to evaluate marine biogeochemical models

Lee de Mora et al.

Correspondence to: Lee de Mora (ledm@pml.ac.uk)

- gmd-11-4215-2018-supplement-title-page.pdf
- GMD-2018-103-supplment
  - assets
    - \* css
    - \* fonts
    - \* js
    - \* sass
  - images
    - \* CESM1-BGC\_rcp85\_r1i1p1\_AMOC\_26N\_regionless\_layerless\_metricless.png
    - \* CESM1-BGC\_rcp85\_r1i1p1\_DrakePassageTransport\_regionless\_layerless\_metricless.png
    - \* CESM1-BGC\_rcp85\_r1i1p1\_TotalAirSeaFluxCO2\_regionless\_layerless\_metricless.png
    - \* CESM1-BGC\_rcp85\_r1i1p1\_TotalIntPP\_regionless\_layerless\_metricless.png
    - \* CMCC-CESM\_rcp85\_r1i1p1\_AMOC\_26N\_regionless\_layerless\_metricless.png
    - \* CMCC-CESM\_rcp85\_r1i1p1\_Chlorophyll\_Global\_Surface\_map.png
    - \* CMCC-CESM\_rcp85\_r1i1p1\_Chlorophyll\_Global\_Surface\_mean.png
    - \* CMCC-CESM\_rcp85\_r1i1p1\_Chlorophyll\_Global\_Surface\_percentiles\_10-90pc.png
    - \* CMCC-CESM\_rcp85\_r1i1p1\_DrakePassageTransport\_regionless\_layerless\_metricless.png
    - \* CMCC-CESM\_rcp85\_r1i1p1\_TotalAirSeaFluxCO2\_regionless\_layerless\_metricless.png
    - \* CMCC-CESM\_rcp85\_r1i1p1\_TotalIntPP\_regionless\_layerless\_metricless.png
    - \* GFDL-ESM2G\_rcp85\_r1i1p1\_AMOC\_26N\_regionless\_layerless\_metricless.png
    - \* GFDL-ESM2G\_rcp85\_r1i1p1\_Chlorophyll\_Global\_Surface\_map.png
    - \* GFDL-ESM2G\_rcp85\_r1i1p1\_Chlorophyll\_Global\_Surface\_mean.png
    - \* GFDL-ESM2G\_rcp85\_r1i1p1\_Chlorophyll\_Global\_Surface\_percentiles\_10-90pc.png
    - \* GFDL-ESM2G\_rcp85\_r1i1p1\_DrakePassageTransport\_regionless\_layerless\_metricless.png
    - \* GFDL-ESM2G\_rcp85\_r1i1p1\_TotalAirSeaFluxCO2\_regionless\_layerless\_metricless.png
    - \* GFDL-ESM2G\_rcp85\_r1i1p1\_TotalIntPP\_regionless\_layerless\_metricless.png
    - \* GFDL-ESM2M\_rcp85\_r1i1p1\_AMOC\_26N\_regionless\_layerless\_metricless.png

- \* GFDL-ESM2M\_rcp85\_r1i1p1\_Chlorophyll\_Global\_Surface\_map.png
- \* GFDL-ESM2M\_rcp85\_r1i1p1\_Chlorophyll\_Global\_Surface\_mean.png
- \* GFDL-ESM2M\_rcp85\_r1i1p1\_Chlorophyll\_Global\_Surface\_percentiles\_10-90pc.png
- \* GFDL-ESM2M\_rcp85\_r1i1p1\_DrakePassageTransport\_regionless\_layerless\_metricless.png
- \* GFDL-ESM2M\_rcp85\_r1i1p1\_TotalAirSeaFluxCO2\_regionless\_layerless\_metricless.png
- \* GFDL-ESM2M\_rcp85\_r1i1p1\_TotalIntPP\_regionless\_layerless\_metricless.png
- \* GISS-E2-H-CC\_rcp85\_r1i1p1\_AMOC\_26N\_regionless\_layerless\_metricless.png
- \* GISS-E2-H-CC\_rcp85\_r1i1p1\_Chlorophyll\_Global\_Surface\_map.png
- \* GISS-E2-H-CC\_rcp85\_r1i1p1\_Chlorophyll\_Global\_Surface\_mean.png
- \* GISS-E2-H-CC\_rcp85\_r1i1p1\_Chlorophyll\_Global\_Surface\_percentiles\_10-90pc.png
- \* GISS-E2-H-CC\_rcp85\_r1i1p1\_DrakePassageTransport\_regionless\_layerless\_metricless.png
- \* GISS-E2-H-CC\_rcp85\_r1i1p1\_TotalAirSeaFluxCO2\_regionless\_layerless\_metricless.png
- \* GISS-E2-H-CC\_rcp85\_r1i1p1\_TotalIntPP\_regionless\_layerless\_metricless.png
- \* GISS-E2-R-CC\_rcp85\_r1i1p1\_AMOC\_26N\_regionless\_layerless\_metricless.png
- \* GISS-E2-R-CC\_rcp85\_r1i1p1\_Chlorophyll\_Global\_Surface\_map.png
- \* GISS-E2-R-CC\_rcp85\_r1i1p1\_Chlorophyll\_Global\_Surface\_mean.png
- \* GISS-E2-R-CC\_rcp85\_r1i1p1\_Chlorophyll\_Global\_Surface\_percentiles\_10-90pc.png
- \* GISS-E2-R-CC\_rcp85\_r1i1p1\_DrakePassageTransport\_regionless\_layerless\_metricless.png
- \* GISS-E2-R-CC\_rcp85\_r1i1p1\_TotalAirSeaFluxCO2\_regionless\_layerless\_metricless.png
- \* GISS-E2-R-CC\_rcp85\_r1i1p1\_TotalIntPP\_regionless\_layerless\_metricless.png
- \* HadGEM2-CC\_rcp85\_r1i1p1\_AMOC\_26N\_regionless\_layerless\_metricless.png
- \* HadGEM2-CC\_rcp85\_r1i1p1\_Chlorophyll\_Global\_Surface\_map.png
- \* HadGEM2-CC\_rcp85\_r1i1p1\_Chlorophyll\_Global\_Surface\_mean.png
- \* HadGEM2-CC\_rcp85\_r1i1p1\_Chlorophyll\_Global\_Surface\_percentiles\_10-90pc.png
- \* HadGEM2-CC\_rcp85\_r1i1p1\_DrakePassageTransport\_regionless\_layerless\_metricless.png
- \* HadGEM2-CC\_rcp85\_r1i1p1\_TotalAirSeaFluxCO2\_regionless\_layerless\_metricless.png
- \* HadGEM2-CC\_rcp85\_r1i1p1\_TotalIntPP\_regionless\_layerless\_metricless.png
- \* HadGEM2-ES\_rcp85\_r1i1p1\_AMOC\_26N\_regionless\_layerless\_metricless.png
- \* HadGEM2-ES\_rcp85\_r1i1p1\_Chlorophyll\_Global\_Surface\_map.png
- \* HadGEM2-ES\_rcp85\_r1i1p1\_Chlorophyll\_Global\_Surface\_mean.png
- \* HadGEM2-ES\_rcp85\_r1i1p1\_Chlorophyll\_Global\_Surface\_percentiles\_10-90pc.png
- \* HadGEM2-ES\_rcp85\_r1i1p1\_DrakePassageTransport\_regionless\_layerless\_metricless.png
- \* HadGEM2-ES\_rcp85\_r1i1p1\_Nitrate\_Transects\_ATransect\_2000\_global\_hist.png
- \* HadGEM2-ES\_rcp85\_r1i1p1\_Nitrate\_Transects\_ATransect\_2000\_global\_robinquad.png
- \* HadGEM2-ES\_rcp85\_r1i1p1\_Nitrate\_Transects\_ATransect\_2000\_global\_scatter.png
- \* HadGEM2-ES\_rcp85\_r1i1p1\_Nitrate\_Transects\_ATransect\_2000\_global\_transect.png
- \* HadGEM2-ES\_rcp85\_r1i1p1\_TotalAirSeaFluxCO2\_regionless\_layerless\_metricless.png
- \* HadGEM2-ES\_rcp85\_r1i1p1\_TotalIntPP\_regionless\_layerless\_metricless.png
- \* HadGEM2-ES\_rcp85\_r1i1p1\_no3\_Global\_Surface\_map.png
- \* HadGEM2-ES\_rcp85\_r1i1p1\_no3\_Global\_Surface\_mean.png
- \* HadGEM2-ES\_rcp85\_r1i1p1\_no3\_Global\_Surface\_percentiles\_10-90pc.png
- \* HadGEM2-ES\_rcp85\_r1i1p1\_no3\_Global\_mean\_profile.png
- \* HadGEM2-ES\_rcp85\_r1i1p1\_no3\_Global\_mean\_profileDiff.png
- \* HadGEM2-ES\_rcp85\_r1i1p1\_no3\_Global\_mean\_profilehov.png
- \* HadGEM2-ES\_rcp85\_r1i1p1\_no3\_Surface\_2000\_Global\_PlateCarreeQuad.png
- \* HadGEM2-ES\_rcp85\_r1i1p1\_no3\_Surface\_2000\_Global\_hist.png
- \* HadGEM2-ES\_rcp85\_r1i1p1\_no3\_Surface\_2000\_Global\_robinquad.png

- \* HadGEM2-ES\_rcp85\_rli1p1\_no3\_Surface\_2000\_Global\_scatter.png
- \* IPSL-CM5A-MR\_rcp85\_rli1p1\_AMOC\_26N\_regionless\_layerless\_metricless.png
- \* IPSL-CM5A-MR\_rcp85\_rli1p1\_Chlorophyll\_Global\_Surface\_map.png
- \* IPSL-CM5A-MR\_rcp85\_rli1p1\_Chlorophyll\_Global\_Surface\_mean.png
- \* IPSL-CM5A-MR\_rcp85\_rli1p1\_Chlorophyll\_Global\_Surface\_percentiles\_10-90pc.png
- \* IPSL-CM5A-MR\_rcp85\_rli1p1\_DrakePassageTransport\_regionless\_layerless\_metricless.png
- \* IPSL-CM5A-MR\_rcp85\_rli1p1\_TotalAirSeaFluxCO2\_regionless\_layerless\_metricless.png
- \* IPSL-CM5A-MR\_rcp85\_rli1p1\_TotalIntPP\_regionless\_layerless\_metricless.png
- \* IPSL-CM5B-LR\_rcp85\_rli1p1\_AMOC\_26N\_regionless\_layerless\_metricless.png
- \* IPSL-CM5B-LR\_rcp85\_rli1p1\_Chlorophyll\_Global\_Surface\_map.png
- \* IPSL-CM5B-LR\_rcp85\_rli1p1\_Chlorophyll\_Global\_Surface\_mean.png
- \* IPSL-CM5B-LR\_rcp85\_rli1p1\_Chlorophyll\_Global\_Surface\_percentiles\_10-90pc.png
- \* IPSL-CM5B-LR\_rcp85\_rli1p1\_DrakePassageTransport\_regionless\_layerless\_metricless.png
- \* IPSL-CM5B-LR\_rcp85\_rli1p1\_TotalAirSeaFluxCO2\_regionless\_layerless\_metricless.png
- \* IPSL-CM5B-LR\_rcp85\_rli1p1\_TotalIntPP\_regionless\_layerless\_metricless.png
- \* MPI-ESM-LR\_rcp85\_rli1p1\_AMOC\_26N\_regionless\_layerless\_metricless.png
- \* MPI-ESM-LR\_rcp85\_rli1p1\_Chlorophyll\_Global\_Surface\_map.png
- \* MPI-ESM-LR\_rcp85\_rli1p1\_Chlorophyll\_Global\_Surface\_mean.png
- \* MPI-ESM-LR\_rcp85\_rli1p1\_Chlorophyll\_Global\_Surface\_percentiles\_10-90pc.png
- \* MPI-ESM-LR\_rcp85\_rli1p1\_DrakePassageTransport\_regionless\_layerless\_metricless.png
- \* MPI-ESM-LR\_rcp85\_rli1p1\_TotalAirSeaFluxCO2\_regionless\_layerless\_metricless.png
- \* MPI-ESM-LR\_rcp85\_rli1p1\_TotalIntPP\_regionless\_layerless\_metricless.png
- \* MPI-ESM-MR\_rcp85\_rli1p1\_AMOC\_26N\_regionless\_layerless\_metricless.png
- \* MPI-ESM-MR\_rcp85\_rli1p1\_Chlorophyll\_Global\_Surface\_map.png
- \* MPI-ESM-MR\_rcp85\_rli1p1\_Chlorophyll\_Global\_Surface\_mean.png
- \* MPI-ESM-MR\_rcp85\_rli1p1\_Chlorophyll\_Global\_Surface\_percentiles\_10-90pc.png
- \* MPI-ESM-MR\_rcp85\_rli1p1\_DrakePassageTransport\_regionless\_layerless\_metricless.png
- \* MPI-ESM-MR\_rcp85\_rli1p1\_TotalAirSeaFluxCO2\_regionless\_layerless\_metricless.png
- \* MPI-ESM-MR\_rcp85\_rli1p1\_TotalIntPP\_regionless\_layerless\_metricless.png
- \* NorESM1-ME\_rcp85\_rli1p1\_AMOC\_26N\_regionless\_layerless\_metricless.png
- \* NorESM1-ME\_rcp85\_rli1p1\_DrakePassageTransport\_regionless\_layerless\_metricless.png
- \* NorESM1-ME\_rcp85\_rli1p1\_TotalAirSeaFluxCO2\_regionless\_layerless\_metricless.png
- \* NorESM1-ME\_rcp85\_rli1p1\_TotalIntPP\_regionless\_layerless\_metricless.png
- \* RegionLegend.png
- \* Region\_Legend\_NorthAtlantic.png
- \* TransectsLegend.png
- \* TransectsLegendBoth.png
- \* analysisparsertable.html
- \* avatar.jpg
- \* banner.jpg
- \* favicon.png
- \* gmd-2018-103.txt
- \* rcp85\_rli1p1\_Global\_Surface\_mean\_Chlorophyll\_DataOnly.png
- \* rcp85\_rli1p1\_Global\_Surface\_mean\_Chlorophyll\_movingav1year.png
- \* rcp85\_rli1p1\_Global\_Surface\_mean\_Chlorophyll\_movingav5years.png
- \* rcp85\_rli1p1\_Global\_Surface\_mean\_no3\_DataOnly.png
- \* rcp85\_rli1p1\_Global\_Surface\_mean\_no3\_movingav1year.png

- \* rcp85\_r1i1p1\_Global\_Surface\_mean\_no3\_movingav5years.png
- \* rcp85\_r1i1p1\_Global\_Surface\_median\_Chlorophyll\_DataOnly.png
- \* rcp85\_r1i1p1\_Global\_Surface\_median\_Chlorophyll\_movingav1year.png
- \* rcp85\_r1i1p1\_Global\_Surface\_median\_Chlorophyll\_movingav5years.png
- \* rcp85\_r1i1p1\_Global\_Surface\_median\_no3\_DataOnly.png
- \* rcp85\_r1i1p1\_Global\_Surface\_median\_no3\_movingav1year.png
- \* rcp85\_r1i1p1\_Global\_Surface\_median\_no3\_movingav5years.png
- \* rcp85\_r1i1p1\_SouthernOcean\_Surface\_mean\_no3\_DataOnly.png
- \* rcp85\_r1i1p1\_SouthernOcean\_Surface\_mean\_no3\_movingav1year.png
- \* rcp85\_r1i1p1\_SouthernOcean\_Surface\_mean\_no3\_movingav5years.png
- \* rcp85\_r1i1p1\_SouthernOcean\_Surface\_median\_no3\_DataOnly.png
- \* rcp85\_r1i1p1\_SouthernOcean\_Surface\_median\_no3\_movingav1year.png
- \* rcp85\_r1i1p1\_SouthernOcean\_Surface\_median\_no3\_movingav5years.png
- \* rcp85\_r1i1p1\_regionless\_layerless\_metricless\_AMOC\_26N\_DataOnly.png
- \* rcp85\_r1i1p1\_regionless\_layerless\_metricless\_AMOC\_26N\_movingav1year.png
- \* rcp85\_r1i1p1\_regionless\_layerless\_metricless\_AMOC\_26N\_movingav5years.png
- \* rcp85\_r1i1p1\_regionless\_layerless\_metricless\_DrakePassageTransport\_DataOnly.png
- \* rcp85\_r1i1p1\_regionless\_layerless\_metricless\_DrakePassageTransport\_movingav1year.png
- \* rcp85\_r1i1p1\_regionless\_layerless\_metricless\_DrakePassageTransport\_movingav5years.png
- \* rcp85\_r1i1p1\_regionless\_layerless\_metricless\_TotalAirSeaFluxCO2\_DataOnly.png
- \* rcp85\_r1i1p1\_regionless\_layerless\_metricless\_TotalAirSeaFluxCO2\_movingav1year.png
- \* rcp85\_r1i1p1\_regionless\_layerless\_metricless\_TotalAirSeaFluxCO2\_movingav5years.png
- \* rcp85\_r1i1p1\_regionless\_layerless\_metricless\_TotalIntPP\_DataOnly.png
- \* rcp85\_r1i1p1\_regionless\_layerless\_metricless\_TotalIntPP\_movingav1year.png
- \* rcp85\_r1i1p1\_regionless\_layerless\_metricless\_TotalIntPP\_movingav5years.png
- index.html
- readmeandlicense
  - \* LICENSE.txt
  - \* README.txt

The copyright of individual parts of the supplement might differ from the CC BY 4.0 License.
